# Supplementary material
Source: PubMed Central journal article supplement (PMC6156182)

Supplemental Figures for:  
Treatment and survival of patients with colon cancer aged 80 years and older; an EURECCA international comparison  
Nina Vermeer et al.

**Figure S1A**

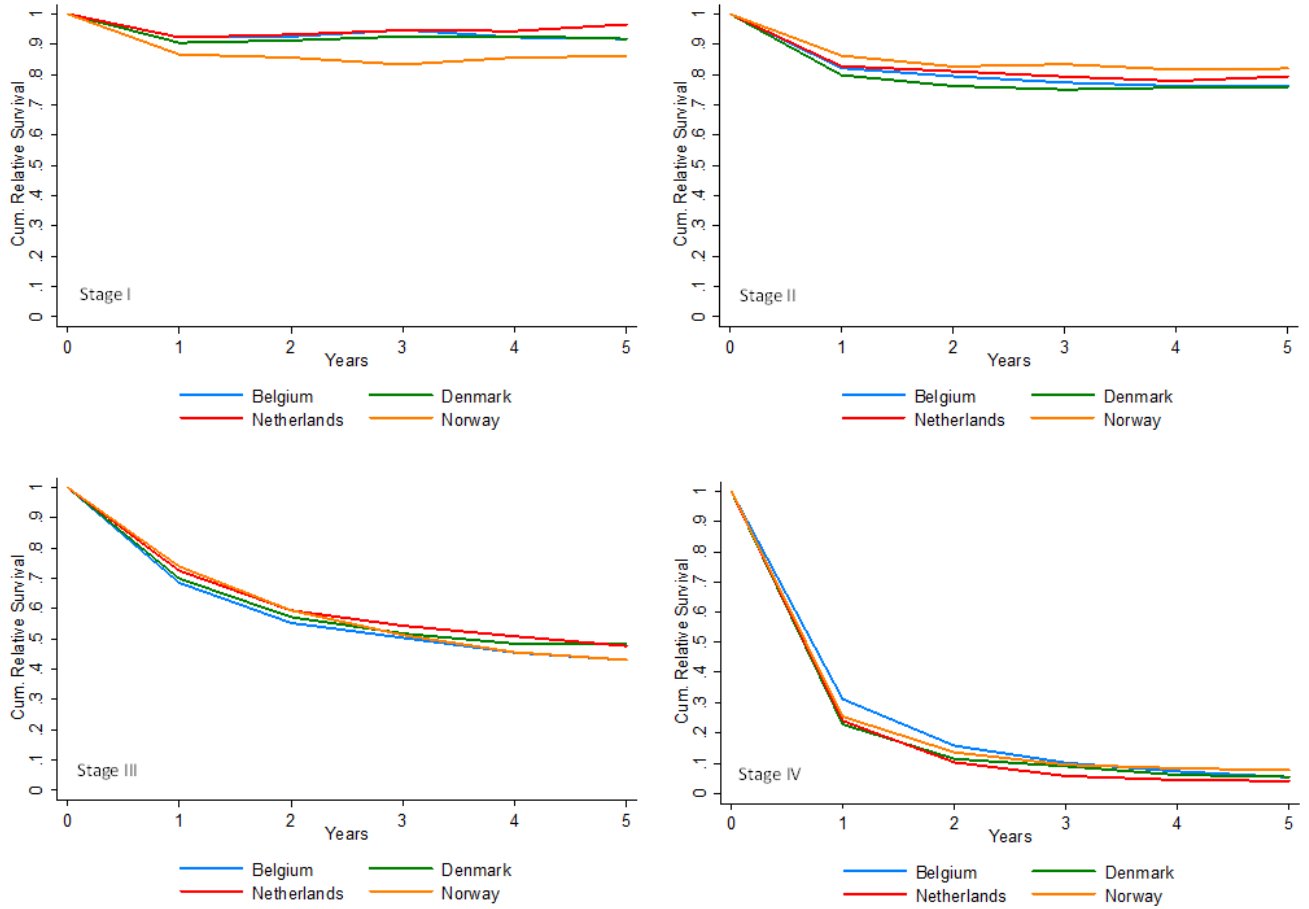

Figure S1B

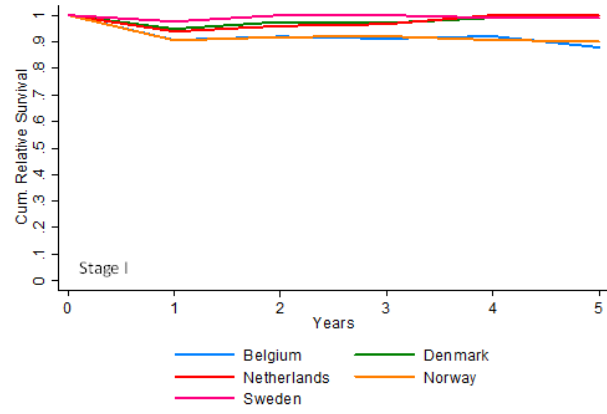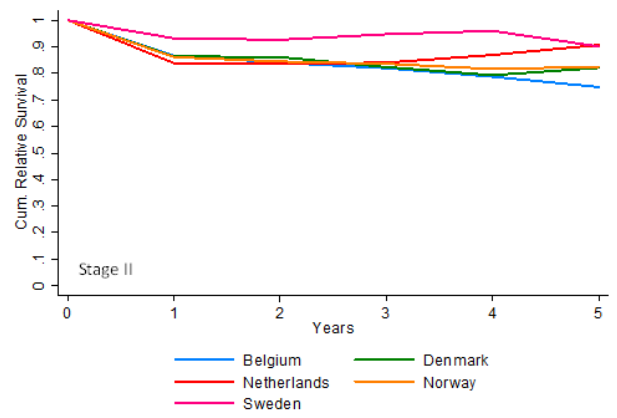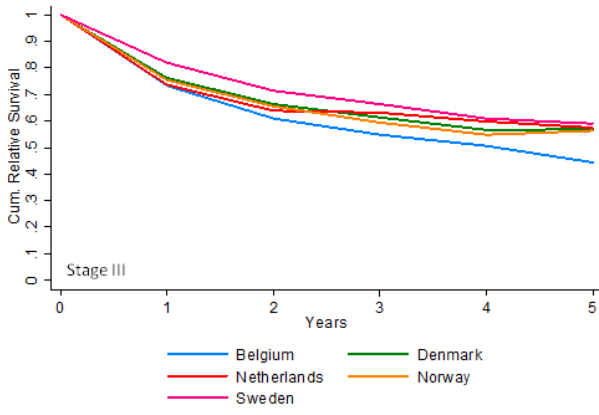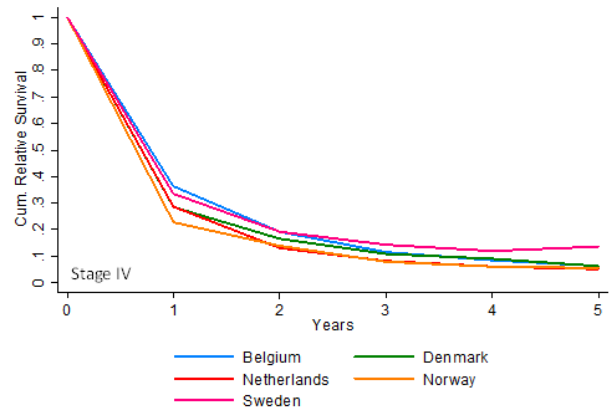

Supplement: supp_the2017-0551_onco12421-sup-0001-suppinfo01.pdf [file supp_the2017-0551_onco12421-sup-0001-suppinfo01.pdf]
